# Supplementary material for: Mixed-dimensional vertical Bi 2 O 2 Se nanopillars/Si heterojunctions with the light confinement effect for high-performance photodetection
Source: Royal Society of Chemistry journal article supplement (doi:10.1039/d4tc03836c), 2024-01-01
Supplement: d4tc03836c1.pdf [file d4tc03836c1.pdf]

## Supplementary Information

### Mixed-Dimensional Vertical Bi<sub>2</sub>O<sub>2</sub>Se Nanopillars/Si Heterojunction with Light Confinement Effect for High-Performance Photodetection

**Authors:** Zhibin Shao,<sup>\*a</sup> Ming Wu,<sup>a</sup> Kai Wu,<sup>b</sup> Xingxing Hong,<sup>c</sup> Lei Wang,<sup>a</sup> Jiangfeng Gong,<sup>a</sup> Meng Xu,<sup>a</sup> Ke Li,<sup>d</sup> Cheng Zhang,<sup>b</sup> and Hong Wang<sup>\*c</sup>

**Affiliations:**

<sup>a</sup> College of Mechanics and Engineering Science, Hohai University, Nanjing, Jiangsu 211100, China

<sup>b</sup> School of Optoelectronic Science and Engineering, Key Lab of Modern Optical Technologies of Education Ministry of China, Soochow University, Suzhou, Jiangsu 215006, China

<sup>c</sup> School of Physical Sciences, University of Science and Technology of China, Hefei, Anhui 230026, China

<sup>d</sup> Nanjing Vocational College of Information Technology, Nanjing, Jiangsu 210023, China

\*Correspondence: zbshao@hhu.edu.cn, hwang08@ustc.edu.cn

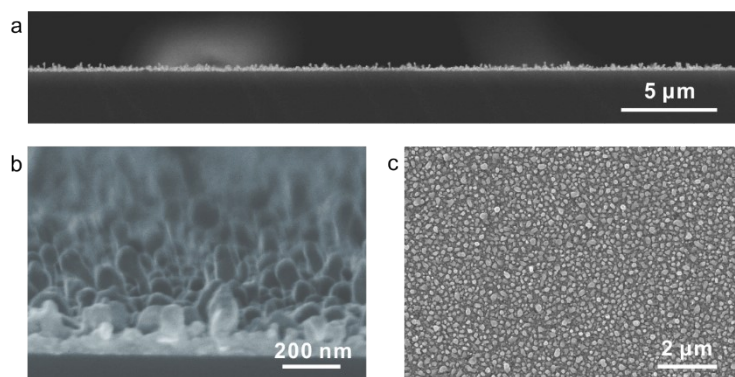

**Figure S1.** (a) Cross-sectional, (b) tilted, and (c) top-view SEM images of Bi<sub>2</sub>O<sub>2</sub>Se nanopillars.

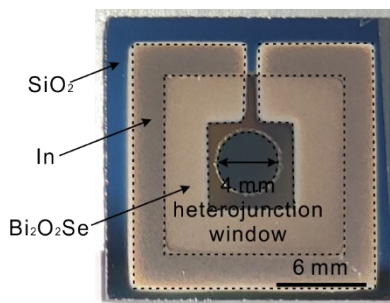

**Figure S2.** Optical photograph of the  $\text{Bi}_2\text{O}_2\text{Se}$  nanopillars/Si heterojunction device.

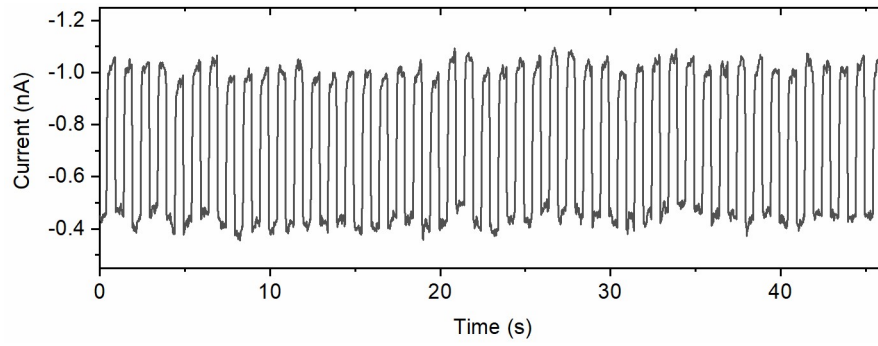

**Figure S3.** Photoresponse curve of the Bi<sub>2</sub>O<sub>2</sub>Se nanopillars/Si heterojunction device measured under pulsed light irradiation (18 nW). A fixed zero voltage was applied during the measurement.

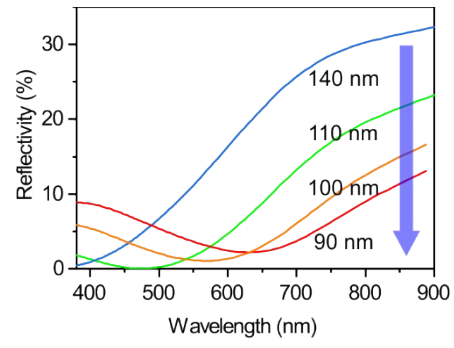

**Figure S4.** Simulated reflection spectra of Bi<sub>2</sub>O<sub>2</sub>Se nanopillars/Si heterojunction with varying nanopillar spacings.

**Table S1.** Comparison of device performance of mixed-dimension 1D Bi<sub>2</sub>O<sub>2</sub>Se nanopillars/3D Si heterojunction-based photodiodes with other Bi<sub>2</sub>O<sub>2</sub>Se-based photodetectors, including 2D Bi<sub>2</sub>O<sub>2</sub>Se photoconductors, 2D Bi<sub>2</sub>O<sub>2</sub>Se heterojunction photodiodes, and mixed-dimensional Bi<sub>2</sub>O<sub>2</sub>Se heterojunction photodiodes.<sup>1-11</sup>

| Photodetectors                                                          | Self-driven | Detectivity (Jones)                    | Rise/Fall time (ms) | References      |
|-------------------------------------------------------------------------|-------------|----------------------------------------|---------------------|-----------------|
| 2D Bi <sub>2</sub> O <sub>2</sub> Se                                    | No          | -                                      | 5.4/2               | [1]             |
| 2D Bi <sub>2</sub> O <sub>2</sub> Se                                    | No          | $8.3 \times 10^{11}$                   | 2.8                 | [2]             |
| Graphene/C60 @2D Bi <sub>2</sub> O <sub>2</sub> Se                      | No          | $7.31 \times 10^9$                     | 2.9                 | [3]             |
| CsPbBr <sub>3</sub> @2D Bi <sub>2</sub> O <sub>2</sub> Se               | No          | $1.02 \times 10^{12}$                  | 0.96/1.36           | [4]             |
| 2D Bi <sub>2</sub> O <sub>2</sub> Se/1D Te                              | Yes         | $2.5 \times 10^{11}$                   | 0.33/0.4            | [5]             |
| 1D Bi <sub>2</sub> O <sub>2</sub> Se/2D MoSe <sub>2</sub>               | Yes         | $1.68 \times 10^{10}$                  | 0.35/0.38           | [6]             |
| 2D Bi <sub>2</sub> O <sub>2</sub> Se/2D WS <sub>2</sub>                 | Yes         | $9 \times 10^8$                        | 33/38               | [7]             |
| 2D Bi <sub>2</sub> O <sub>2</sub> Se/2D BP                              | Yes         | $2.8 \times 10^{11}$                   | 9                   | [8]             |
| 2D Bi <sub>2</sub> O <sub>2</sub> Se/2D MoSe <sub>2</sub>               | Yes         | $3.7 \times 10^{11}$                   | 790/490             | [9]             |
| 2D Bi <sub>2</sub> O <sub>2</sub> Se/2D Bi <sub>2</sub> Se <sub>3</sub> | Yes         | $1.18 \times 10^7$                     | 274/318             | [10]            |
| 2D Bi <sub>2</sub> O <sub>2</sub> Se/2D BP                              | Yes         | $1.14 \times 10^{10}$                  | 0.12/0.14           | [11]            |
| <b>1D Bi<sub>2</sub>O<sub>2</sub>Se NPs/3D Si</b>                       | <b>Yes</b>  | <b><math>6.1 \times 10^{12}</math></b> | <b>0.024/0.04</b>   | <b>Our work</b> |

## REFERENCES

- 1 Y. Chen, W. Ma, C. Tan, M. Luo, W. Zhou, N. Yao, H. Wang, L. Zhang, T. Xu, T. Tong, Y. Zhou, Y. Xu, C. Yu, C. Shan, H. Peng, F. Yue, P. Wang, Z. Huang and W. Hu, *Adv. Funct. Mater.*, 2021, **31**, 2009554.

- 2 J. Li, Z. Wang, Y. Wen, J. Chu, L. Yin, R. Cheng, L. Lei, P. He, C. Jiang, L. Feng and J. He, *Adv. Funct. Mater.*, 2018, **28**, 1706437.
- 3 J. Han, X. Han, C. Zhang, S. Peng, C. Han, X. Zhang, X. Liu, X. Du, J. Gou and J. Wang, *J. Mater. Chem. C*, 2021, **9**, 7910-7918.
- 4 C. Fan, B. Dai, H. Liang, X. Xu, Z. Qi, H. Jiang, H. Duan and Q. Zhang, *Adv. Funct. Mater.*, 2021, **31**, 2010263.
- 5 W. Wang, Y. Meng, W. Wang, Z. Zhang, P. Xie, Z. Lai, X. Bu, Y. Li, C. Liu, Z. Yang, S. Yip and J. C. Ho, *Adv. Funct. Mater.*, 2022, **32**, 2203003.
- 6 Z. Chen, J. Huang, M. Yang, X. Liu, Z. Zheng, N. Huo, L. Han, D. Luo, J. Li and W. Gao, *ACS Appl. Mater. Interfaces*, 2023, **15**, 30504-30516.
- 7 C. Fang, J. Han, M. Yu, W. Liu, S. Gao and K. Huang, *Adv. Mater. Interfaces*, 2022, **9**, 2102091.
- 8 X. Liu, W. Wang, F. Yang, S. Feng, Z. Hu, J. Lu and Z. Ni, *Sci. China Inf. Sci.*, 2021, **64**, 140404.
- 9 T. Yang, X. Li, L. Wang, Y. Liu, K. Chen, X. Yang, L. Liao, L. Dong and C.-X. Shan, *J. Mater. Sci.*, 2019, **54**, 14742-14751.
- 10 M. Yu, C. Fang, J. Han, W. Liu, S. Gao and K. Huang, *ACS Appl. Mater. Interfaces*, 2022, **14**, 13507-13515.
- 11 Y. Chen, C. Tan, Z. Wang, J. Miao, X. Ge, T. Zhao, K. Liao, H. Ge, Y. Wang, F. Wang, Y. Zhou, P. Wang, X. Zhou, C. Shan, H. Peng and W. Hu, *Sci. Adv.*, 2022, **8**, eabq1781.
